# Supplementary material for: Determinants for proton location and electron coupled proton transfer in hydrogen bonded pentafluorophenol–anion clusters
Source: Royal Society of Chemistry journal article supplement (doi:10.1039/d0cp02892d), 2020-01-01
Supplement: d0cp02892d1.pdf [file d0cp02892d1.pdf]

## Electronic Supplementary Information for

### **Determinants for proton location and electron coupled proton transfer in hydrogen bonded pentafluorophenol-anion clusters**

Jian Zhang,<sup>1</sup> Yan Yang,<sup>2</sup> Zhenrong Sun,<sup>2\*</sup> and Xue-Bin Wang<sup>3\*</sup>

*<sup>1</sup>Key Laboratory of Science and Technology of Eco-Textiles, Ministry of Education, College of Chemistry, Chemical Engineering and Biotechnology, Dong Hua University, Shanghai, 201620, China*

*<sup>2</sup>State Key Laboratory of Precision Spectroscopy, and Department of Physics, East China Normal University, Shanghai 200062, China*

*<sup>3</sup>Physical Sciences Division, Pacific Northwest National Laboratory, 902 Battelle Boulevard, P. O. Box 999, MS K8-88, Richland, Washington 99352, USA*

## Table of Contents

|                                                                                                                                                                                                                                                                                                                                                                   |
|-------------------------------------------------------------------------------------------------------------------------------------------------------------------------------------------------------------------------------------------------------------------------------------------------------------------------------------------------------------------|
| <b>Figure S1</b> Comparison of NIPE spectra of $[\text{C}_6\text{F}_5\text{O}\cdot\text{H}\cdot\text{A}]^-$ , A = F, Cl, Br, I, SCN, $\text{NO}_2$ , $\text{NO}_3$ , OH, $\text{CH}_3\text{O}$ , $\text{ClO}_4$ , and $\text{HSO}_4$ along with $\text{C}_6\text{F}_5\text{O}^-$ obtained at different wavelengths<br>.....S3                                     |
| <b>Figure S2</b> Comparison of the NIPE spectra of $[\text{C}_6\text{F}_5\text{O}^-\cdot\text{H}^+\cdot\text{A}^-]$ with the spectra of the isolated anions $\text{A}^-$ and $\text{C}_6\text{F}_5\text{O}^-$ that are shifted in EBE to match the complex spectra.....S4                                                                                         |
| <b>Table S1</b> NPA charge distributions of the $[\text{C}_6\text{F}_5\text{O}\cdot\text{H}\cdot\text{A}]^-$ complexes and the corresponding unrelaxed<br>/ relaxed<br>neutrals.....S5                                                                                                                                                                            |
| <b>Figure S3</b> The HOMO and HOMO-1 for the anion complexes $[\text{C}_6\text{F}_5\text{O}\cdot\text{H}\cdot\text{A}]^-$ , A = I, SCN, $\text{NO}_2$ , OH, F, $\text{ClO}_4$ , and $\text{HSO}_4$ .....S6                                                                                                                                                        |
| <b>Table S2</b> Electron density of the anion complexes. The density is plotted in the plane of the three atoms consisting of hydrogen and the two bonded atoms from $\text{C}_6\text{F}_5\text{O}$ and anion A (A = F, Cl, Br, I, SCN, $\text{CH}_3\text{O}$ , OH, $\text{NO}_2$ , $\text{NO}_3$ , $\text{ClO}_4$ , and $\text{HSO}_4$ ).....S7                  |
| <b>Figure S4</b> Potential curves for $[\text{C}_6\text{F}_5\text{O}\cdot\text{H}\cdot\text{A}]^-$ A = Cl, Br, I, SCN (a), A= $\text{CH}_3\text{O}$ , $\text{NO}_2$ , OH and F (b), and calculated energy curves for $[\text{C}_6\text{F}_5\text{O}\cdot\text{H}\cdot\text{A}]$ A = $\text{ClO}_4$ (c), A = $\text{HSO}_4$ (d), and A = $\text{NO}_3$ (e)..... S8 |

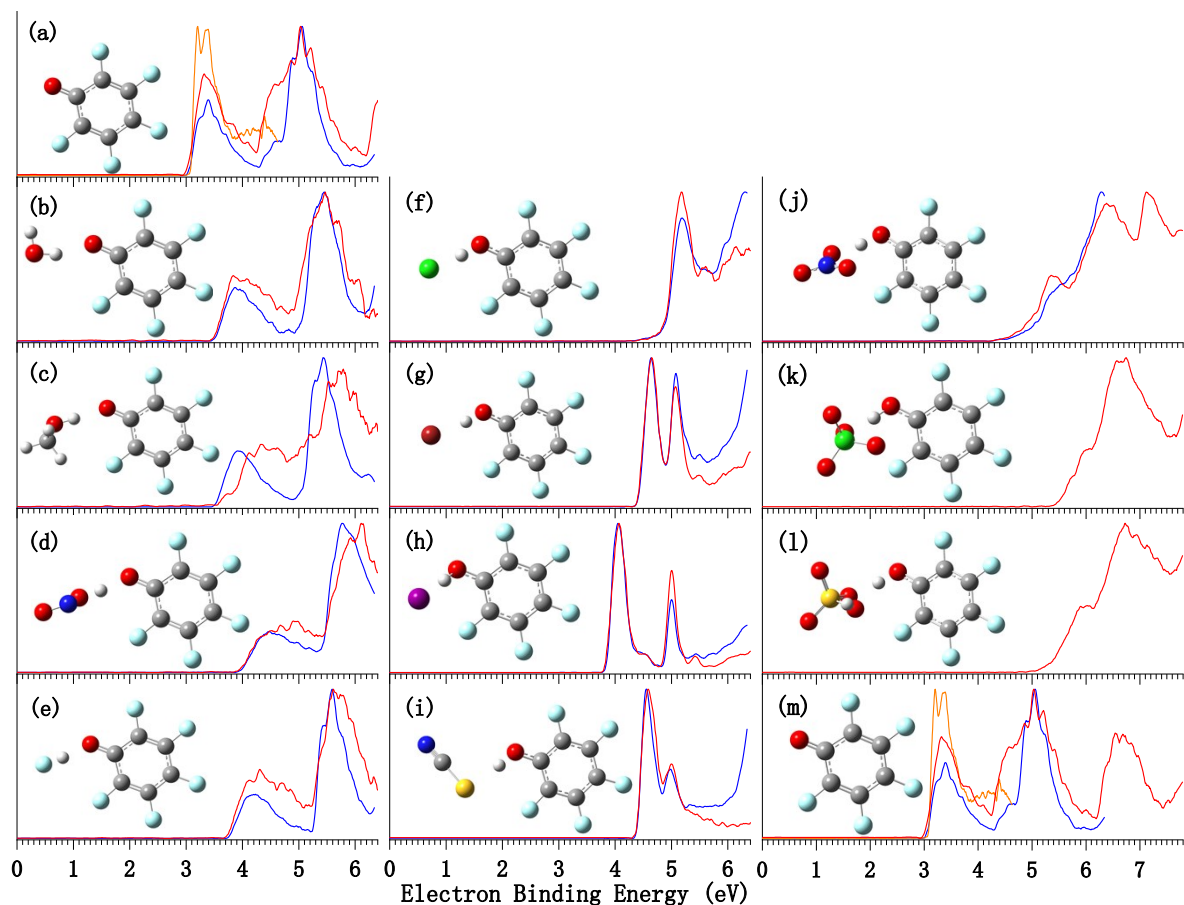

**Figure S1** Comparison of NIPE spectra of  $C_6F_5O^-$  (a),  $[C_6F_5O^- \cdot H^+ \cdot A]^-$  A = OH (b),  $CH_3O$  (c),  $NO_2$  (d), F (e), Cl (f), Br (g), I (h), SCN (i),  $NO_3$  (j),  $ClO_4$  (k),  $HSO_4$  (l), and  $C_6F_5O^-$  (m) at 266 (4.661 eV, orange), 193 (6.424 eV, blue), and 157 nm (7.867 eV, red). The B3LYP/6-311++g(df,pd) (LANL2DZ for I) optimized anion complex structures are shown as inset. Note the 157 nm spectra of (a)-(i) are only plotted out to 6.4 eV for better view of the onset region of the spectra.

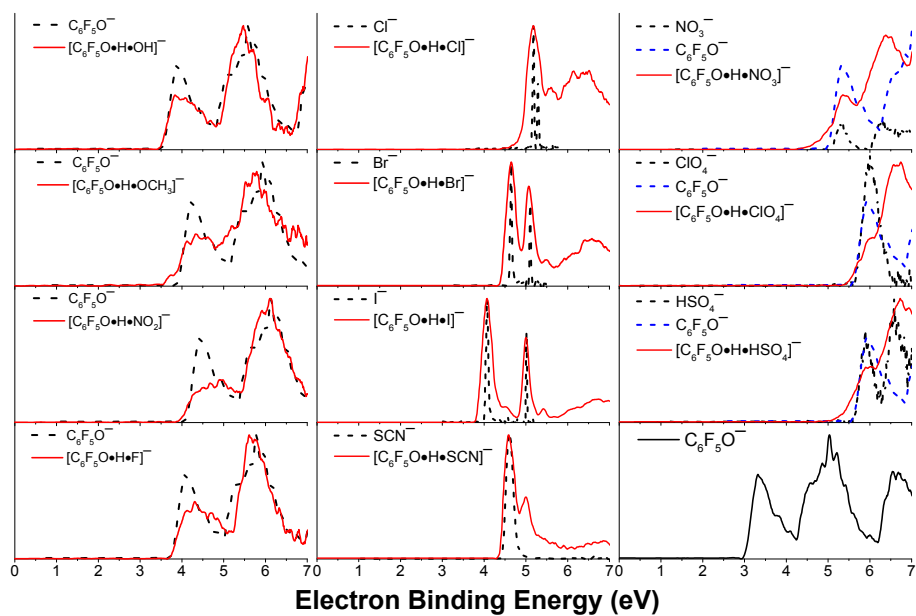

**Figure S2** Comparison of the NIPE spectra of  $[\text{C}_6\text{F}_5\text{O}\cdot\text{H}\cdot\text{A}]^-$  with the spectra of the isolated anions  $\text{A}^-$  (ref. 1-5) and  $\text{C}_6\text{F}_5\text{O}^-$  that are shifted in EBE to match the complex spectra.

- 1 X. B. Wang, X. Yang, L. S. Wang, and J. B. Nicholas, *J. B. J. Chem. Phys.*, 2002, **116**, 561-570.
- 2 X. B. Wang and L. S. Wang, *J. Chem. Phys.* 2000, **113**, 10928-10933.
- 3 G. L. Hou, W. Lin, S. H. M. Deng, J. Zhang, W. Zheng, F. Paesani, and X.-B. Wang, *J. Phys. Chem. Lett.* 2013, **4**, 779-785.
- 4 M. Valiev, S. H. M. Deng, and X. B. Wang, *J. Phys Chem. B*, 2016, **120**, 1518-1525.
- 5 M. Cheng, Y. Feng, Y. Du, Q. Zhu, W. Zheng, G. Czako and J. M. Bowman, *J. Chem. Phys.*, 2011, **134**, 191102.

**Table S1. NPA charge distributions of the  $[\text{C}_6\text{F}_5\text{O}\cdot\text{H}\cdot\text{A}]^-$  complexes and the corresponding unrelaxed/relaxed neutrals.**

|          |                                                                 | Anionic / unrelaxed / relaxed neutral complexes |                                       |                                           |
|----------|-----------------------------------------------------------------|-------------------------------------------------|---------------------------------------|-------------------------------------------|
|          |                                                                 | $\text{C}_6\text{F}_5\text{O}$                  | H                                     | A                                         |
|          | $\text{C}_6\text{F}_5\text{O}\cdot\text{H}$                     | -0.487                                          | 0.487                                 |                                           |
| Type I   | $[\text{C}_6\text{F}_5\text{O}\cdot\text{H}\cdot\text{Br}]^-$   | -0.650/-0.307/-0.361                            | 0.487/0.468/0.499                     | -0.837/-0.161/-0.138                      |
|          | $[\text{C}_6\text{F}_5\text{O}\cdot\text{H}\cdot\text{I}]^-$    | -0.651/-0.490/-0.456                            | 0.483/0.461/0.494                     | -0.832/0.029/-0.038                       |
|          | $[\text{C}_6\text{F}_5\text{O}\cdot\text{H}\cdot\text{SCN}]^-$  | -0.627/-0.439/-0.491                            | 0.481/0.465/0.489                     | -0.854/-0.026/0.002                       |
| Type II  | $[\text{C}_6\text{F}_5\text{O}\cdot\text{H}\cdot\text{OCH}_3]$  | -0.958/0.012/0.006                              | 0.511/0.481/0.478                     | -0.553/-0.493/-0.484                      |
|          | $[\text{C}_6\text{F}_5\text{O}\cdot\text{H}\cdot\text{NO}_2]^-$ | -0.881/0.044/0.019(-0.508) <sup>a</sup>         | 0.500/0.482/0.490(0.499) <sup>a</sup> | -0.619/-0.526/-0.509(0.009) <sup>a</sup>  |
|          | $[\text{C}_6\text{F}_5\text{O}\cdot\text{H}\cdot\text{OH}]^-$   | -0.967/0.011/0.008                              | 0.507/0.478/0.478                     | -0.540/-0.489/-0.486                      |
|          | $[\text{C}_6\text{F}_5\text{O}\cdot\text{H}\cdot\text{F}]^-$    | -0.909/0.068/0.027                              | 0.559/0.542/0.560                     | -0.650/-0.610/-0.587                      |
| Type III | $[\text{C}_6\text{F}_5\text{O}\cdot\text{H}\cdot\text{NO}_3]^-$ | -0.653/-0.090/0.033                             | 0.504/0.499/0.504                     | -0.851/-0.409/-0.537                      |
|          | $[\text{C}_6\text{F}_5\text{O}\cdot\text{H}\cdot\text{ClO}_4]$  | -0.599/0.037/0.039                              | 0.523/0.526/0.511                     | -0.924/-0.563/-0.550                      |
|          | $[\text{C}_6\text{F}_5\text{O}\cdot\text{H}\cdot\text{HSO}_4]$  | -0.617/-0.06/0.034                              | 0.528/0.527/0.522                     | -0.911/-0.467/-0.556                      |
| Type IV  | $[\text{C}_6\text{F}_5\text{O}\cdot\text{H}\cdot\text{Cl}]^-$   | -0.672/-0.172/-0.176(0.022) <sup>a</sup>        | 0.472/0.456/0.478(0.279) <sup>a</sup> | -0.800/-0.284/-0.302(-0.301) <sup>a</sup> |

<sup>a</sup> NPA charges for the 2<sup>nd</sup> more stable proton transferred structures of the neutrals.

|        |                                                                                     |                                                                                     |                                                                                      |
|--------|-------------------------------------------------------------------------------------|-------------------------------------------------------------------------------------|--------------------------------------------------------------------------------------|
|        | $[\text{C}_6\text{F}_5\text{O}\cdot\text{H}\cdot\text{I}]^-$                        | $[\text{C}_6\text{F}_5\text{O}\cdot\text{H}\cdot\text{SCN}]^-$                      |                                                                                      |
| HOMO   | 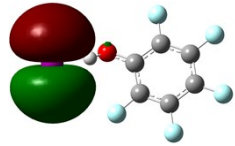   |    |                                                                                      |
| HOMO-1 |    |    |                                                                                      |
|        | $[\text{C}_6\text{F}_5\text{O}\cdot\text{H}\cdot\text{NO}_2]^-$                     | $[\text{C}_6\text{F}_5\text{O}\cdot\text{H}\cdot\text{OH}]^-$                       | $[\text{C}_6\text{F}_5\text{O}\cdot\text{H}\cdot\text{F}]^-$                         |
| HOMO   |    |    |   |
| HOMO-1 |   |   |  |
|        | $[\text{C}_6\text{F}_5\text{O}\cdot\text{H}\cdot\text{ClO}_4]^-$                    | $[\text{C}_6\text{F}_5\text{O}\cdot\text{H}\cdot\text{HSO}_4]^-$                    |                                                                                      |
| HOMO   |  |  |                                                                                      |
| HOMO-1 |  |  |                                                                                      |

**Figure S3.** The HOMO and HOMO-1 for the anion complexes  $[\text{C}_6\text{F}_5\text{O}\cdot\text{H}\cdot\text{A}]^-$ , A = I, SCN,  $\text{NO}_2$ , OH, F,  $\text{ClO}_4$ , and  $\text{HSO}_4$ .

**Table S2.** Electron density of the anion complexes. The density is plotted in the plane of the three atoms consisting of the hydrogen and the two bonded atoms from  $C_6F_5O$  and A (A = F, Cl, Br, I, SCN,  $CH_3O$ , OH,  $NO_2$ ,  $NO_3$ ,  $ClO_4$ , and  $HSO_4$ ).

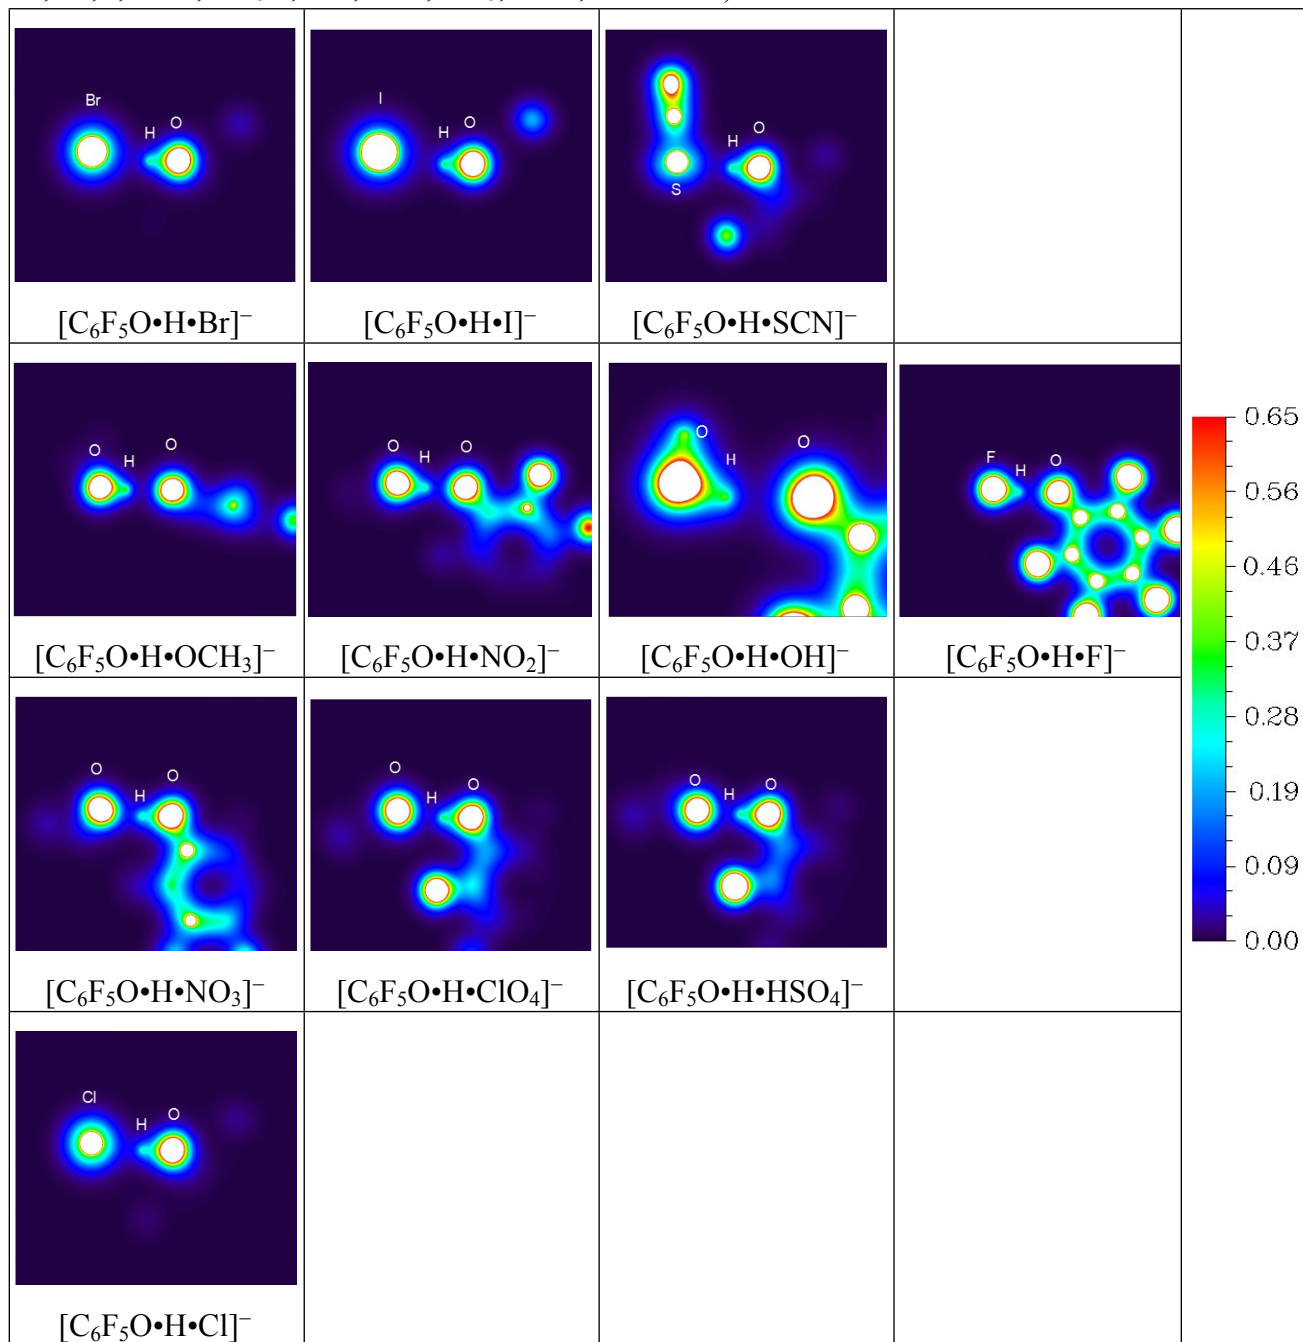

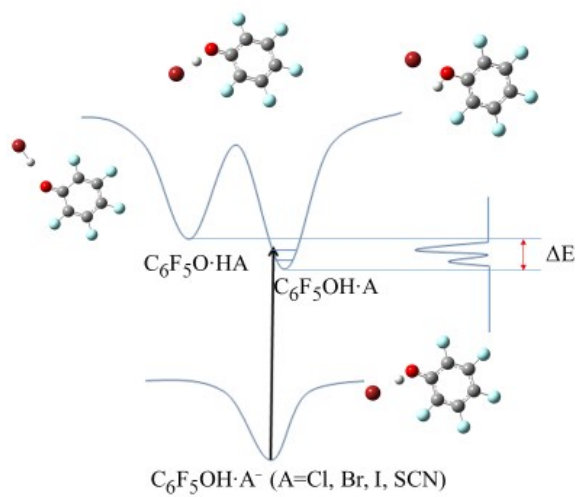

(a)

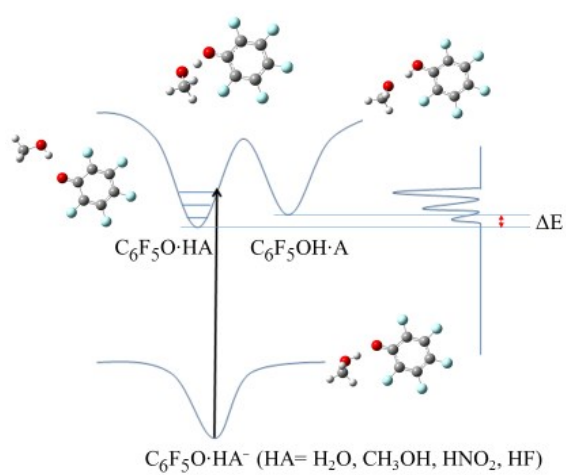

(b)

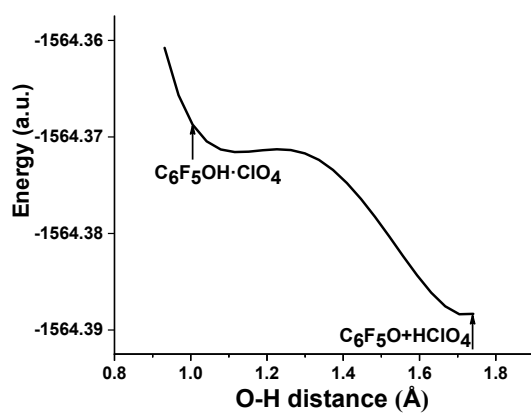

(c)



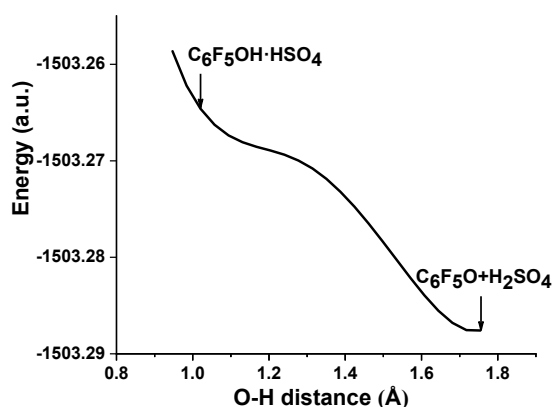

(d)

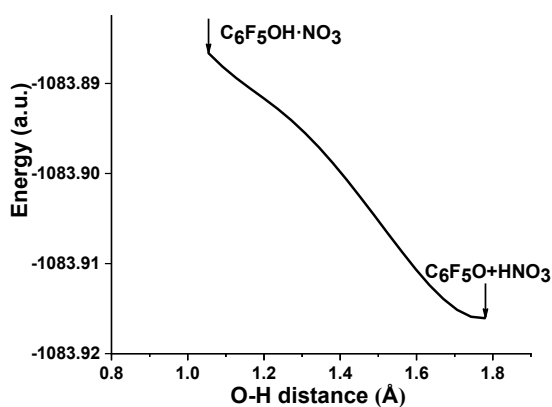

(e)

**Figure S4.** Schematic potential curves for  $[\text{C}_6\text{F}_5\text{O}\cdot\text{H}\cdot\text{A}]^-$  and  $[\text{C}_6\text{F}_5\text{O}\cdot\text{H}\cdot\text{A}]$   $\text{A} = \text{Cl}, \text{Br}, \text{I}, \text{SCN}$  (a),  $\text{A} = \text{CH}_3\text{O}, \text{NO}_2, \text{OH}$  and  $\text{F}$  (b), and the calculated one-dimension energy curves for the neutral complexes with  $\text{A} = \text{ClO}_4$  (c),  $\text{A} = \text{HSO}_4$  (d), and  $\text{A} = \text{NO}_3$  (e). The potential curves in (c), (d) and (e) are calculated by moving H atom between  $\text{C}_6\text{F}_5\text{O}$  and the respective anion A. The first arrow denotes the vertical position on the neutral surface with the anionic geometry of  $[\text{C}_6\text{F}_5\text{O}\cdot\text{H}\cdots\text{A}]$  and the second arrow indicates the PT product on the neutral surface with the optimized  $[\text{C}_6\text{F}_5\text{O}\cdots\text{H}\cdot\text{A}]$  configuration. We divided the H atom moving process into 20 steps by adjusting the bond length of O--H and H--A at the same time (note the total O  $\cdots$  A distance also varied from the initial to the final values) and fixing all other atoms without further optimization. The potential curves are obtained by calculating the M06-2X/aug-cc-pvtz single point energy of each geometry in each step.
